# Supplementary material
Source: PubMed Central journal article supplement (PMC9204623)
Supplement: jama-e229615-s003.pdf [file jama-e229615-s003.pdf]

\*Indicates required information. Only first name, last name, and suffix will appear in PubMed.

| <b>*Group Name(s): FIRST-ABC Step-Up RCT Investigators</b> |                   |                              |                         |                                                                                                   |                                                 |                                                                |                                                                                                   |
|------------------------------------------------------------|-------------------|------------------------------|-------------------------|---------------------------------------------------------------------------------------------------|-------------------------------------------------|----------------------------------------------------------------|---------------------------------------------------------------------------------------------------|
| <b>*First Name and Middle Initial(s)</b>                   | <b>*Last Name</b> | <b>*Suffix (eg, Jr, III)</b> | <b>Academic Degrees</b> | <b>Institution</b>                                                                                | <b>Location (city, state/province, country)</b> | <b>Role or Contribution, eg, chair, principal investigator</b> | <b>Group (if more than 1 Group listed in the byline) and/or Subgroup (eg, Steering Committee)</b> |
| Nazima                                                     | Pathan            |                              | PhD, FRCPC              | Addenbrooke's Hospital, Cambridge University Hospitals NHS Foundation Trust                       | Cambridge, UK                                   | Principal Investigator                                         |                                                                                                   |
| Deborah K                                                  | White             |                              | MSc                     | Addenbrooke's Hospital, Cambridge University Hospitals NHS Foundation Trust                       | Cambridge, UK                                   | Research Nurse                                                 |                                                                                                   |
| Esther S                                                   | Daubney           |                              | BSc                     | Addenbrooke's Hospital, Cambridge University Hospitals NHS Foundation Trust                       | Cambridge, UK                                   | Research Nurse                                                 |                                                                                                   |
| Nayan                                                      | Shetty            |                              | MBBS                    | Alder Hey Hospital, Alder Hey Children's NHS Foundation Trust                                     | Liverpool, UK                                   | Principal Investigator                                         |                                                                                                   |
| Jones                                                      | Dawn              |                              | DipHE                   | Alder Hey Hospital, Alder Hey Children's NHS Foundation Trust                                     | Liverpool, UK                                   | Research Nurse                                                 |                                                                                                   |
| O'Malley                                                   | Laura             |                              | BSc (Hons)              | Alder Hey Hospital, Alder Hey Children's NHS Foundation Trust                                     | Liverpool, UK                                   | Research Nurse                                                 |                                                                                                   |
| Rad                                                        | Laura             |                              | BSc (Hons)              | Alder Hey Hospital, Alder Hey Children's NHS Foundation Trust                                     | Liverpool, UK                                   | Research Nurse                                                 |                                                                                                   |
| Peter                                                      | Davis             |                              | MB ChB                  | Bristol Royal Hospital for Children, University Hospitals Bristol and Weston NHS Foundation Trust | Bristol, UK                                     | Principal Investigator                                         | Trial Management Group                                                                            |
| Frances                                                    | Hutchings         |                              | BMBS                    | Bristol Royal Hospital for Children, University Hospitals Bristol and Weston NHS Foundation Trust | Bristol, UK                                     | Co-Principal Investigator                                      |                                                                                                   |
| Karen                                                      | Coy               |                              | MN                      | Bristol Royal Hospital for Children, University Hospitals Bristol and Weston NHS Foundation Trust | Bristol, UK                                     | Research Nurse                                                 |                                                                                                   |
| Sarah                                                      | Sheedy            |                              | BSc                     | Bristol Royal Hospital for Children, University Hospitals Bristol and Weston NHS Foundation Trust | Bristol, UK                                     | Research Nurse                                                 |                                                                                                   |
| Alice                                                      | Bowerman          |                              | BSc                     | Bristol Royal Hospital for Children, University Hospitals Bristol and Weston NHS Foundation Trust | Bristol, UK                                     | Outreach Nurse                                                 |                                                                                                   |
| Kerry                                                      | Mahoney           |                              | BSc (Hons)              | Bristol Royal Hospital for Children, University Hospitals Bristol and Weston NHS Foundation Trust | Bristol, UK                                     | Outreach Nurse                                                 |                                                                                                   |
| Laura                                                      | Dodge             |                              | BSc (Hons)              | Bristol Royal Hospital for Children, University Hospitals Bristol and Weston NHS Foundation Trust | Bristol, UK                                     | Research Trial Co-ordinator                                    |                                                                                                   |
| Helen                                                      | Raeside           |                              | MBBS                    | Chelsea and Westminster Hospital, Chelsea and Westminster Hospital NHS Foundation Trust           | London, UK                                      | Principal Investigator                                         |                                                                                                   |
| Pardina                                                    | Samson-Fessale    |                              | BSc                     | Chelsea and Westminster Hospital, Chelsea and Westminster Hospital NHS Foundation Trust           | London, UK                                      | Study Coordinator                                              |                                                                                                   |
| Kribashnie                                                 | Nundlall          |                              | BSc                     | Chelsea and Westminster Hospital, Chelsea and Westminster Hospital NHS Foundation Trust           | London, UK                                      | Study Coordinator                                              |                                                                                                   |
| Jaime                                                      | Carungcong        |                              | BSc                     | Chelsea and Westminster Hospital, Chelsea and Westminster Hospital NHS Foundation Trust           | London, UK                                      | Study Coordinator                                              |                                                                                                   |
| Aravind S                                                  | Kashyap           |                              | MMedSci                 | Great North Children's Hospital, Newcastle upon Tyne Hospitals NHS Foundation Trust               | Newcastle upon Tyne, UK                         | Principal Investigator                                         |                                                                                                   |
| Christine                                                  | Mackerness        |                              | MSc                     | Great North Children's Hospital, Newcastle upon Tyne Hospitals NHS Foundation Trust               | Newcastle upon Tyne, UK                         | Principal Investigator                                         |                                                                                                   |
| Sarah E                                                    | Daggert           |                              | BA                      | Great North Children's Hospital, Newcastle upon Tyne Hospitals NHS Foundation Trust               | Newcastle upon Tyne, UK                         | Research Nurse                                                 |                                                                                                   |
| Rob                                                        | Claydon           |                              |                         | Great North Children's Hospital, Newcastle upon Tyne Hospitals NHS Foundation Trust               | Newcastle upon Tyne, UK                         | Staff Nurse/Research Nurse                                     |                                                                                                   |
| Kirsty                                                     | Mulgrew           |                              |                         | Great North Children's Hospital, Newcastle upon Tyne Hospitals NHS Foundation Trust               | Newcastle upon Tyne, UK                         | Research/PICU Nurse                                            |                                                                                                   |
| Mark J                                                     | Peters            |                              | PhD                     | Great Ormond Street Hospital, Great Ormond Street Hospital for Children NHS Foundation Trust      | London, UK                                      | Principal Investigator                                         | Trial Management Group                                                                            |
| Ana L                                                      | Pereira Tomas     |                              | MSc                     | Great Ormond Street Hospital, Great Ormond Street Hospital for Children NHS Foundation Trust      | London, UK                                      | Research Nurse                                                 |                                                                                                   |
| Holly                                                      | Belfield          |                              | BSc                     | Great Ormond Street Hospital, Great Ormond Street Hospital for Children NHS Foundation Trust      | London, UK                                      | Research Nurse                                                 |                                                                                                   |
| Lauran                                                     | O'Neill Gutierrez |                              | BSc                     | Great Ormond Street Hospital, Great Ormond Street Hospital for Children NHS Foundation Trust      | London, UK                                      | Senior Research Nurse                                          |                                                                                                   |
| Hamza                                                      | Meghari           |                              | MSc                     | Great Ormond Street Hospital, Great Ormond Street Hospital for Children NHS Foundation Trust      | London, UK                                      | Research Coordinator                                           |                                                                                                   |
| Emily                                                      | Beech             |                              | BSc                     | Great Ormond Street Hospital, Great Ormond Street Hospital for Children NHS Foundation Trust      | London, UK                                      | Data Administrator                                             |                                                                                                   |
| Gareth                                                     | Jones             |                              | MBBS                    | Great Ormond Street Hospital, Great Ormond Street Hospital for Children NHS Foundation Trust      | London, UK                                      | ICU Research Fellow                                            |                                                                                                   |

\*Indicates required information. Only first name, last name, and suffix will appear in PubMed.

| *First Name and Middle Initial(s) | *Last Name     | *Suffix (eg, Jr, III) | Academic Degrees               | Institution                                                                                  | Location (city, state/province, country) | Role or Contribution, eg, chair, principal investigator | Group (if more than 1 Group listed in the byline) and/or Subgroup (eg, Steering Committee) |
|-----------------------------------|----------------|-----------------------|--------------------------------|----------------------------------------------------------------------------------------------|------------------------------------------|---------------------------------------------------------|--------------------------------------------------------------------------------------------|
| Samiran                           | Ray            |                       | PhD                            | Great Ormond Street Hospital, Great Ormond Street Hospital for Children NHS Foundation Trust | London, UK                               | PICU Consultant                                         |                                                                                            |
| Saxena                            | Rohit          |                       | MD                             | Great Ormond Street Hospital, Great Ormond Street Hospital for Children NHS Foundation Trust | London, UK                               | CICU Consultant                                         |                                                                                            |
| Hilary                            | Klonin         |                       |                                | Hull Royal Infirmary, Hull University Teaching Hospitals NHS Trust                           | East Riding of Yorkshire, UK             | Principal Investigator                                  |                                                                                            |
| Remy                              | Toko           |                       |                                | Hull Royal Infirmary, Hull University Teaching Hospitals NHS Trust                           | East Riding of Yorkshire, UK             | Co-Principal Investigator                               |                                                                                            |
| Melony                            | Bowdler-Hayes  |                       |                                | Hull Royal Infirmary, Hull University Teaching Hospitals NHS Trust                           | East Riding of Yorkshire, UK             | Research Nurse                                          |                                                                                            |
| Leanne                            | Sherris        |                       |                                | Hull Royal Infirmary, Hull University Teaching Hospitals NHS Trust                           | East Riding of Yorkshire, UK             | Research Nurse                                          |                                                                                            |
| Arshid                            | Murad          |                       | MRCPCH                         | James Cook University Hospital, South Tees Hospitals NHS Foundation Trust                    | Middlesbrough, UK                        | Principal Investigator                                  |                                                                                            |
| Armstrong                         | Sonia          |                       | Masters                        | James Cook University Hospital, South Tees Hospitals NHS Foundation Trust                    | Middlesbrough, UK                        | Research Nurse                                          |                                                                                            |
| Hebbron                           | Kerry          |                       |                                | James Cook University Hospital, South Tees Hospitals NHS Foundation Trust                    | Middlesbrough, UK                        | Research Coordinator                                    |                                                                                            |
| Szekeres                          | Adele          |                       |                                | James Cook University Hospital, South Tees Hospitals NHS Foundation Trust                    | Middlesbrough, UK                        | Research Coordinator                                    |                                                                                            |
| Avishay                           | Sarfatti       |                       | MA                             | John Radcliffe Hospital, Oxford University Hospitals NHS Foundation Trust                    | Oxford, UK                               | Principal Investigator                                  |                                                                                            |
| Zoe                               | Oliver         |                       | BSc                            | John Radcliffe Hospital, Oxford University Hospitals NHS Foundation Trust                    | Oxford, UK                               | Senior Research Nurse                                   |                                                                                            |
| Sarah                             | Barton         |                       | BSc                            | John Radcliffe Hospital, Oxford University Hospitals NHS Foundation Trust                    | Oxford, UK                               | Children's Critical Care Outreach Sister                |                                                                                            |
| Melanie                           | James          |                       | BA                             | John Radcliffe Hospital, Oxford University Hospitals NHS Foundation Trust                    | Oxford, UK                               | Research Nurse                                          |                                                                                            |
| Lynda                             | Verhulst       |                       | MD, FRCPCH                     | King's College Hospital, King's College Hospital NHS Foundation Trust                        | London, UK                               | Principal Investigator                                  |                                                                                            |
| Ivan Carlo                        | Caro           |                       | MAN, RN                        | King's College Hospital, King's College Hospital NHS Foundation Trust                        | London, UK                               | Paediatric Research Nurse                               |                                                                                            |
| Akash                             | Deep           |                       | MD, FRCPCH                     | King's College Hospital, King's College Hospital NHS Foundation Trust                        | London, UK                               | Director - Paediatric Intensive Care Unit               |                                                                                            |
| Bedangshu                         | Saikia         |                       | MBBS                           | Leicester Royal Infirmary, University Hospitals Of Leicester NHS Trust                       | Leicester, UK                            | Principal Investigator                                  |                                                                                            |
| Samira                            | Neshat         |                       | MBBS                           | Leicester Royal Infirmary, University Hospitals Of Leicester NHS Trust                       | Leicester, UK                            | Co- Principal Investigator                              |                                                                                            |
| Rekha                             | Patel          |                       | MSc, RN                        | Leicester Royal Infirmary, University Hospitals Of Leicester NHS Trust                       | Leicester, UK                            | Research Nurse                                          |                                                                                            |
| Seema                             | Sukhani        |                       | MBBS, MRCPCH                   | Luton and Dunstable Hospital, Luton and Dunstable Hospital NHS Foundation Trust              | Luton, UK                                | Principal investigator                                  |                                                                                            |
| Karen                             | Samm           |                       | BSc in Paediatric Nursing      | Luton and Dunstable Hospital, Luton and Dunstable Hospital NHS Foundation Trust              | Luton, UK                                | Research Nurse                                          |                                                                                            |
| Benila                            | Ravindranathan |                       | MBBS, MRCPCH                   | Luton and Dunstable Hospital, Luton and Dunstable Hospital NHS Foundation Trust              | Luton, UK                                | Co-Principal Investigator                               |                                                                                            |
| Vanessa                           | Zammit         |                       | MD, FRCPCH                     | Luton and Dunstable Hospital, Luton and Dunstable Hospital NHS Foundation Trust              | Luton, UK                                | Investigator                                            |                                                                                            |
| Meleika                           | Hamilton       |                       | MBBS, MRCPCH, BA               | Luton and Dunstable Hospital, Luton and Dunstable Hospital NHS Foundation Trust              | Luton, UK                                | Investigator                                            |                                                                                            |
| Shagun                            | Shah           |                       | MD                             | Luton and Dunstable Hospital, Luton and Dunstable Hospital NHS Foundation Trust              | Luton, UK                                | Investigator                                            |                                                                                            |
| Susan E                           | Bowes          |                       | MSc Child Health, BN (Hons)    | Noah's Ark Children's Hospital for Wales                                                     | Cardiff, UK                              | Research Nurse                                          |                                                                                            |
| Sivakumar                         | Oruganti       |                       | MSc Child Health, MBBS, FRCPCH | Noah's Ark Children's Hospital for Wales                                                     | Cardiff, UK                              | Principal Investigator                                  |                                                                                            |
| Awen                              | Evans          |                       | BSc (Nursing)                  | Noah's Ark Children's Hospital for Wales                                                     | Cardiff, UK                              | Research Nurse                                          |                                                                                            |
| Laura                             | Anderson       |                       | MSc                            | Queens Medical Centre, Nottingham University Hospitals NHS Trust                             | Nottingham, UK                           | Research Nurse                                          |                                                                                            |
| Maria                             | Saxton         |                       | MNursSci                       | Queens Medical Centre, Nottingham University Hospitals NHS Trust                             | Nottingham, UK                           | Research Nurse                                          |                                                                                            |
| Helen                             | Fazackerley    |                       | MNursSci                       | Queens Medical Centre, Nottingham University Hospitals NHS Trust                             | Nottingham, UK                           | Research Nurse                                          |                                                                                            |
| Catarina                          | Silvestre      |                       | MBBS, RCPCH                    | Queen's Medical Centre, Nottingham University Hospitals NHS Trust                            | Nottingham, UK                           | Principal Investigator                                  |                                                                                            |
| Kamal                             | Patel          |                       | MSc, MBBS                      | Royal Alexandra Hospital, University Hospitals Sussex (East) NHS Foundation Trust            | Brighton, UK                             | Principal Investigator                                  |                                                                                            |
| Kevin                             | Donnelly       |                       | BSc                            | Royal Alexandra Hospital, University Hospitals Sussex (East) NHS Foundation Trust            | Brighton, UK                             | Research Nurse                                          |                                                                                            |
| Emma                              | Tagliavini     |                       | BSc                            | Royal Alexandra Hospital, University Hospitals Sussex (East) NHS Foundation Trust            | Brighton, UK                             | Research Nurse                                          |                                                                                            |
| Vivien                            | Richmond       |                       | BSc                            | Royal Alexandra Hospital, University Hospitals Sussex (East) NHS Foundation Trust            | Brighton, UK                             | Research Nurse                                          |                                                                                            |
| Helen                             | Coutts         |                       | MBBS MRCP (Paeds), MRCPCH      | Royal Blackburn Hospital, East Lancashire Hospitals NHS Trust                                | East Lancashire, UK                      | Principal Investigator                                  |                                                                                            |
| Jessica R                         | Scott          |                       | MBChB                          | Royal Blackburn Hospital, East Lancashire Hospitals NHS Trust                                | East Lancashire, UK                      | Co-investigator                                         |                                                                                            |
| Ellen                             | Smith          |                       | DipNursing (Child)             | Royal Blackburn Hospital, East Lancashire Hospitals NHS Trust                                | East Lancashire, UK                      | Research Nurse                                          |                                                                                            |
| Heather                           | Collier        |                       | BSc (Child)                    | Royal Blackburn Hospital, East Lancashire Hospitals NHS Trust                                | East Lancashire, UK                      | Research Nurse                                          |                                                                                            |

\*Indicates required information. Only first name, last name, and suffix will appear in PubMed.

| *First Name and Middle Initial(s) | *Last Name       | *Suffix (eg, Jr, III) | Academic Degrees                 | Institution                                                                           | Location (city, state/province, country) | Role or Contribution, eg, chair, principal investigator | Group (if more than 1 Group listed in the byline) and/or Subgroup (eg, Steering Committee) |
|-----------------------------------|------------------|-----------------------|----------------------------------|---------------------------------------------------------------------------------------|------------------------------------------|---------------------------------------------------------|--------------------------------------------------------------------------------------------|
| Angela                            | Aramburo         |                       | PhD                              | Royal Brompton Hospital, The Royal Brompton & Harefield NHS Trust                     | London, United Kingdom                   | Principal Investigator                                  |                                                                                            |
| Laura                             | Alcantara Gemmar |                       | BSc                              | Royal Brompton Hospital, The Royal Brompton & Harefield NHS Trust                     | London, United Kingdom                   | Research Nurse                                          |                                                                                            |
| Laura                             | Tous Sampol      |                       | BSc                              | Royal Brompton Hospital, The Royal Brompton & Harefield NHS Trust                     | London, United Kingdom                   | Research Nurse                                          |                                                                                            |
| Jenny C                           | Tan              |                       | MSc                              | Royal Brompton Hospital, The Royal Brompton & Harefield NHS Trust                     | London, United Kingdom                   | Research Nurse                                          |                                                                                            |
| David K                           | Armstrong        |                       | MD                               | Royal Hospital for Children and Young People                                          | Edinburgh, UK                            | Principal Investigator                                  |                                                                                            |
| Laura J                           | Fraser           |                       | MBChB                            | Royal Hospital for Children and Young People                                          | Edinburgh, UK                            | Researcher                                              |                                                                                            |
| Margrethe                         | VanDijke         |                       | MPH                              | Royal Hospital for Children and Young People                                          | Edinburgh, UK                            | Data Facilitator                                        |                                                                                            |
| Ian                               | Piper            |                       | PhD                              | Royal Hospital for Children and Young People                                          | Edinburgh, UK                            | Quality Improvement Co-Ordinator                        |                                                                                            |
| Graham                            | Mason            |                       | MBChB                            | Royal Manchester Children's Hospital, Manchester University NHS Foundation Trust      | Manchester, UK                           | Principal Investigator                                  |                                                                                            |
| Danielle                          | Pask             |                       | MBChB                            | Royal Manchester Children's Hospital, Manchester University NHS Foundation Trust      | Manchester, UK                           | Co-Principal Investigator                               |                                                                                            |
| Lara                              | Bunni            |                       | MBChB                            | Royal Manchester Children's Hospital, Manchester University NHS Foundation Trust      | Manchester, UK                           | Research Fellow                                         |                                                                                            |
| Rebecca                           | Marshall         |                       | DipHE                            | Royal Manchester Children's Hospital, Manchester University NHS Foundation Trust      | Manchester, UK                           | Research Nurse                                          |                                                                                            |
| Claire                            | Jennings         |                       | Mclin Res                        | Royal Manchester Children's Hospital, Manchester University NHS Foundation Trust      | Manchester, UK                           | Research Nurse                                          |                                                                                            |
| Anton-Paul T                      | Mayer            |                       | MRCPC                            | Sheffield's Children Hospital, Sheffield Children's Hospital NHS Foundation Trust     | Sheffield, UK                            | Principal Investigator                                  |                                                                                            |
| Alex                              | Howlett          |                       | PG Cert                          | Sheffield's Children Hospital, Sheffield Children's Hospital NHS Foundation Trust     | Sheffield, UK                            | PCCU Staff Nurse                                        |                                                                                            |
| Jade                              | Bryant           |                       | PG Cert                          | Sheffield's Children Hospital, Sheffield Children's Hospital NHS Foundation Trust     | Sheffield, UK                            | PCCU Staff Nurse                                        |                                                                                            |
| John V                            | Pappachan        |                       | FRCA                             | Southampton Children's Hospital, University Hospital Southampton NHS Foundation Trust | Southampton, UK                          | Principal Investigator                                  |                                                                                            |
| James R                           | Edelman          |                       | MRCPC                            | Southampton Children's Hospital, University Hospital Southampton NHS Foundation Trust | Southampton, UK                          | Co-Investigator                                         |                                                                                            |
| Hannah                            | Taylor           |                       | BSc                              | Southampton Children's Hospital, University Hospital Southampton NHS Foundation Trust | Southampton, UK                          | Paediatric Outreach Nurse Specialist                    |                                                                                            |
| Sophie                            | O'Toole          |                       | BSc                              | Southampton Children's Hospital, University Hospital Southampton NHS Foundation Trust | Southampton, UK                          | Paediatric Outreach Nurse Specialist                    |                                                                                            |
| Amber                             | Cook             |                       | BSc (Hons)                       | Southampton Children's Hospital, University Hospital Southampton NHS Foundation Trust | Southampton, UK                          | Paediatric Research Nurse                               |                                                                                            |
| Christie                          | Mellish          |                       |                                  | Southampton Children's Hospital, University Hospital Southampton NHS Foundation Trust | Southampton, UK                          | Paediatric Research Nurse                               |                                                                                            |
| Nicholas                          | Prince           |                       | MSc                              | St George's Hospital, St George's University Hospitals NHS Foundation Trust           | London, UK                               | Principal Investigator                                  |                                                                                            |
| Joana                             | Gomes de Queiroz |                       | MSc                              | St George's Hospital, St George's University Hospitals NHS Foundation Trust           | London, UK                               | Research Nurse                                          |                                                                                            |
| Elena                             | Maccacari        |                       | BSc                              | St George's Hospital, St George's University Hospitals NHS Foundation Trust           | London, UK                               | Research Nurse                                          |                                                                                            |
| Montserrat                        | Ros Foguet       |                       | PGDip                            | St George's Hospital, St George's University Hospitals NHS Foundation Trust           | London, UK                               | Research Nurse                                          |                                                                                            |
| Rebecca B                         | Mitting          |                       | MBChB MRCPC                      | St Mary's Hospital, Imperial College Healthcare NHS Trust                             | London, UK                               | Principal Investigator                                  |                                                                                            |
| David                             | Inwald           |                       | MB ChB, PhD                      | St Mary's Hospital, Imperial College Healthcare NHS Trust                             | London, UK                               | Consultant                                              |                                                                                            |
| Sarah E                           | Darnell          |                       | RGN/RSCN                         | St Mary's Hospital, Imperial College Healthcare NHS Trust                             | London, UK                               | Research Nurse                                          |                                                                                            |
| Sobia K                           | Mustafa          |                       | MSc/RSCN                         | St Mary's Hospital, Imperial College Healthcare NHS Trust                             | London, UK                               | Research Nurse                                          |                                                                                            |
| Katy E                            | Bridges          |                       | Children's Nursing<br>BSc (Hons) | St Mary's Hospital, Imperial College Healthcare NHS Trust                             | London, UK                               | Research Nurse                                          |                                                                                            |
| Naomi                             | Edmonds          |                       | MBBS                             | The Royal London Hospital, Barts Health NHS Trust                                     | London, UK                               | Principal Investigator                                  |                                                                                            |
| Nosheen                           | Khalid           |                       | MSc                              | The Royal London Hospital, Barts Health NHS Trust                                     | London, UK                               | Clinical Trial Practitioner                             |                                                                                            |
| Natasha                           | Thorn            |                       | MBBS                             | The Royal London Hospital, Barts Health NHS Trust                                     | London, UK                               | Paediatric Clinical Research Fellow                     |                                                                                            |
| Tahmina                           | Khatun           |                       | BSc                              | The Royal London Hospital, Barts Health NHS Trust                                     | London, UK                               | Research Nurse                                          |                                                                                            |
| Sam                               | Peters           |                       | BArch                            | Intensive Care National Audit & Research Centre                                       | London, UK                               | Research Assistant                                      |                                                                                            |
| Lorna                             | Miller           |                       | MSc                              | Intensive Care National Audit & Research Centre                                       | London, UK                               | Research Assistant                                      |                                                                                            |
| Stefan                            | Sprinckmoller    |                       | MPA                              | Intensive Care National Audit & Research Centre                                       | London, UK                               | Data Manager                                            |                                                                                            |
| Abby                              | Koelewyn         |                       | BSc                              | Intensive Care National Audit & Research Centre                                       | London, UK                               | Data Engineer                                           |                                                                                            |
| Carly                             | Au               |                       | BSc                              | Intensive Care National Audit & Research Centre                                       | London, UK                               | Senior Data Manager                                     |                                                                                            |
| Gema                              | Milla            |                       | MSc                              | Intensive Care National Audit & Research Centre                                       | London, UK                               | Research Assistant                                      |                                                                                            |
| Roger                             | Parslow          |                       |                                  | Paediatric Intensive Care Audit Network                                               | London, UK                               |                                                         |                                                                                            |
| Lee                               | Norman           |                       |                                  | Paediatric Intensive Care Audit Network                                               | London, UK                               |                                                         |                                                                                            |
