# Supplementary material
Source: PubMed Central journal article supplement (PMC9204623)
Supplement: jama-e229615-s004.pdf [file jama-e229615-s004.pdf]

Ramnarayan P, Richards-Belle A, Drikite L, et al; FIRST-ABC Step-Up RCT Investigators and the Paediatric Critical Care Society Study Group. Effect of high-flow nasal cannula therapy vs continuous positive airway pressure therapy on liberation from respiratory support in acutely ill children admitted to pediatric critical care units: a randomized clinical trial. *JAMA*. Published online June 16, 2022. doi:10.1001/jama.2022.9615

## **Data Sharing Statement**

### **Data**

**Data available:** Yes

**Data types:** Deidentified participant data

**How to access data:** Email [ctu@icnarc.org](mailto:ctu@icnarc.org)

**When available:** With publication

### **Supporting Documents**

**Document types:** None

### **Additional Information**

**Who can access the data:** Researchers whose proposed use of the data has been approved)

**Types of analyses:** Any purpose

**Mechanisms of data availability:** After approval of a proposal
